# Supplementary material
Source: HighWire-hosted journal article supplement (https://tobaccocontrol.bmj.com/content/2016/04/06/tobaccocontrol-2015-052710)
Supplement: inline-supplementary-material-1 [file inline-supplementary-material-1.pdf]

## Appendix 1. Marijuana Slang Terms Urban Dictionary Definitions

*Purple*—“extremely potent marijuana, specifically marijuana buds that have a purple hue to them. Also accompanied by a fragrant, usually fruity smell and mad perma-grin”

*Loud*—“a slang term for marijuana of high quality. The word was originated in the eastside of Atlanta, zone 6;”

*Cali Green*—“yet another term for the illegal drug marijuana see cheebster, grass;”

*K2*—“a currently completely legal drug in the United States that looks a lot like potpourri but gives out effects very similar to marijuana, sometimes called roses. It is actually synthesized THC but does not come up on a drug test.”]

*Kush*—“A strain of Cannabis, almost solely of the Indica variety. The name "Kush" originates from the Hindu-Kush mountains where it was cultivated for thousands of years. This sweet smelling plant is part of the Cannabis Indica family, which leads the plant to be short and squat in appearance. Some forms of Kush, however, are in fact a hybrid between Cannabis Indica and Cannabis Sativa...which leads to greater harvests. Varieties of the Kush plant include,(But are not limited to), *Hindu Kush*, *OG Kush*, *Purple Kush*, *Master Kush*. Many crossbreeds exist as well.

*Chiba*—“Marijuana.”

*Indo*—“Marijuana, specifically modern crossbreeds of Indonesian (hence, "Indo") indica strains with western sativa, resulting in pungent, broad-leafed, THC-crystal laden buds, or "trees". Often confused for a short form of "indoor", which is where most of this type of marijuana is now grown.”

*Pineapple Express*— “High Grade medical marijuana grown in Southern California. A hybrid cross created from a forced hermaphrodite OG Kush plant pollenating an AK-47 female. Primarily (75%) Indica with Sativa undertones. Medium Height. A taste of pineapple & citrus. THC 16.8%.”
